# Supplementary material for: Moonlight controls lunar-phase-dependency and regular oscillation of clock gene expressions in a lunar-synchronized spawner fish, Goldlined spinefoot
Source: PubMed Central journal article supplement (PMC5906463; doi:10.1038/s41598-018-24538-1), 2018-04-18
Supplement: 41598_2018_24538_MOESM1_ESM.pdf [file 41598_2018_24538_MOESM1_ESM.pdf]

## Supplementary information

### **Moonlight controls lunar-phase-dependency and regular oscillation of clock gene expressions in a lunar-synchronized spawner fish, Goldlined spinefoot**

Yuki Takeuchi<sup>1</sup>, Ryo Kabutomori<sup>1</sup>, Chihiro Yamauchi<sup>2</sup>, Hitomi Miyagi<sup>2</sup>,  
Akihiro Takemura<sup>2</sup>, Keiko Okano<sup>1</sup>, Toshiyuki Okano<sup>1\*</sup>

#### **Author affiliations:**

<sup>1</sup> Department of Electrical Engineering and Bioscience, Graduate School of Advanced Science and Engineering, Waseda University, Wakamatsu-cho 2-2, Shinjuku-ku, Tokyo 162-8480, Japan

<sup>2</sup> Department of Chemistry, Biology, and Marine Science, Faculty of Science, University of the Ryukyus, 1 Senbaru, Nishihara-cho, Nakagami-gun, Okinawa 903-0213, Japan

#### **\*Corresponding author:**

Dr. Toshiyuki Okano

Department of Electrical Engineering and Bioscience, Graduate School of Advanced Science and Engineering, Waseda University, Wakamatsu-cho 2-2, Shinjuku-ku, Tokyo 162-8480, Japan

Tel and Fax: +81-3-5369-7316

E-mail: okano@waseda.jp

**Running title:** Effect of moonlight on clock gene expression in lunar-responsive fish

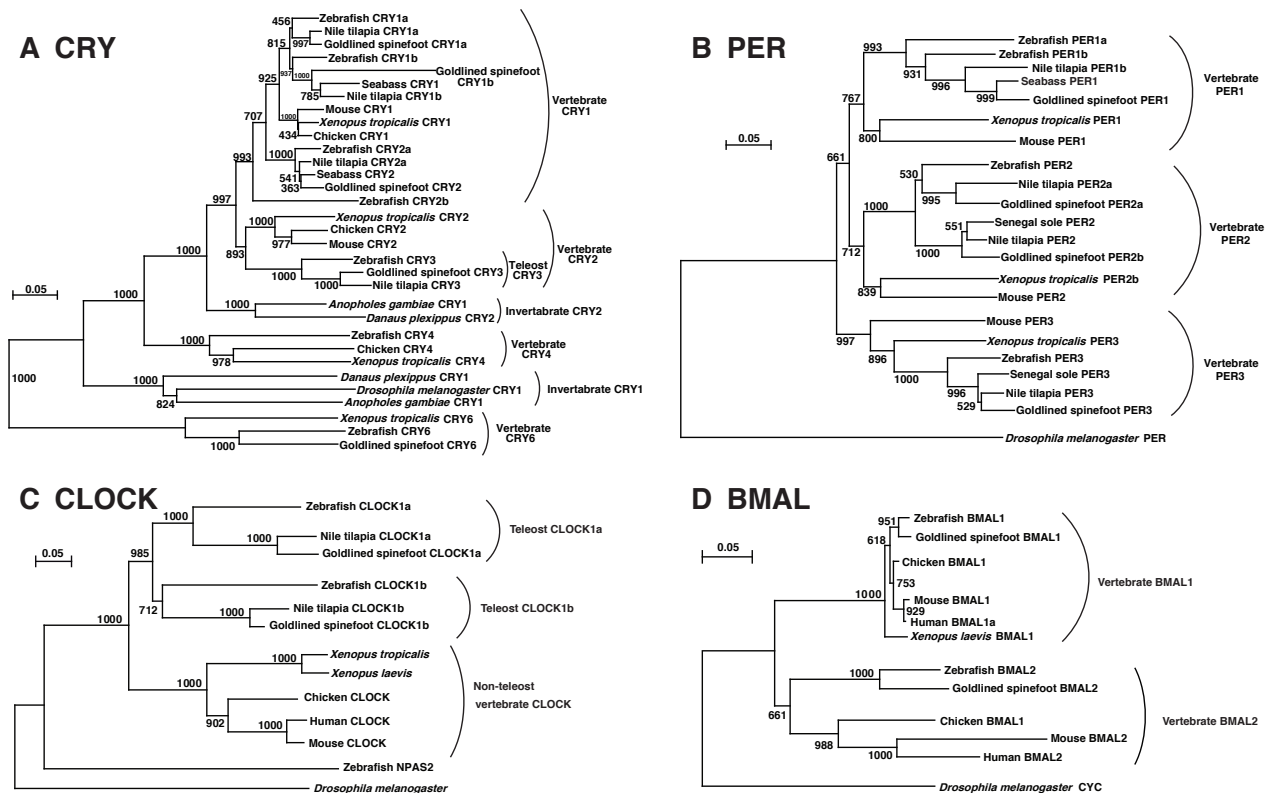

Figure S1. Phylogenetic trees of CRY (A), PER (B), CLOCK (C), and BMAL (D) family proteins. The amino acid sequences of the Goldlined spinefoot CRY, PER, CLOCK, and BMAL candidates were deduced using the ORF Finder program (NCBI, <http://www.ncbi.nlm.nih.gov/>). Multiple alignments with the other clock proteins (accession nos. of are shown in Tables S5-S8) and the construction of a phylogenetic tree using the Neighbor-Joining method (Saitou and Nei, 1987) were conducted using CLUSTAL W (<http://clustalw.ddbj.nig.ac.jp/top-e.html>). One thousand bootstrap repetitions were performed, and values are shown at the inner nodes. The scale bar is calibrated in substitutions per site.

## Reference

Saitou N, Nei M (1987) The neighbor-joining method: a new method for reconstructing phylogenetic trees. *Mol Biol. Evol.* 4: 406–425

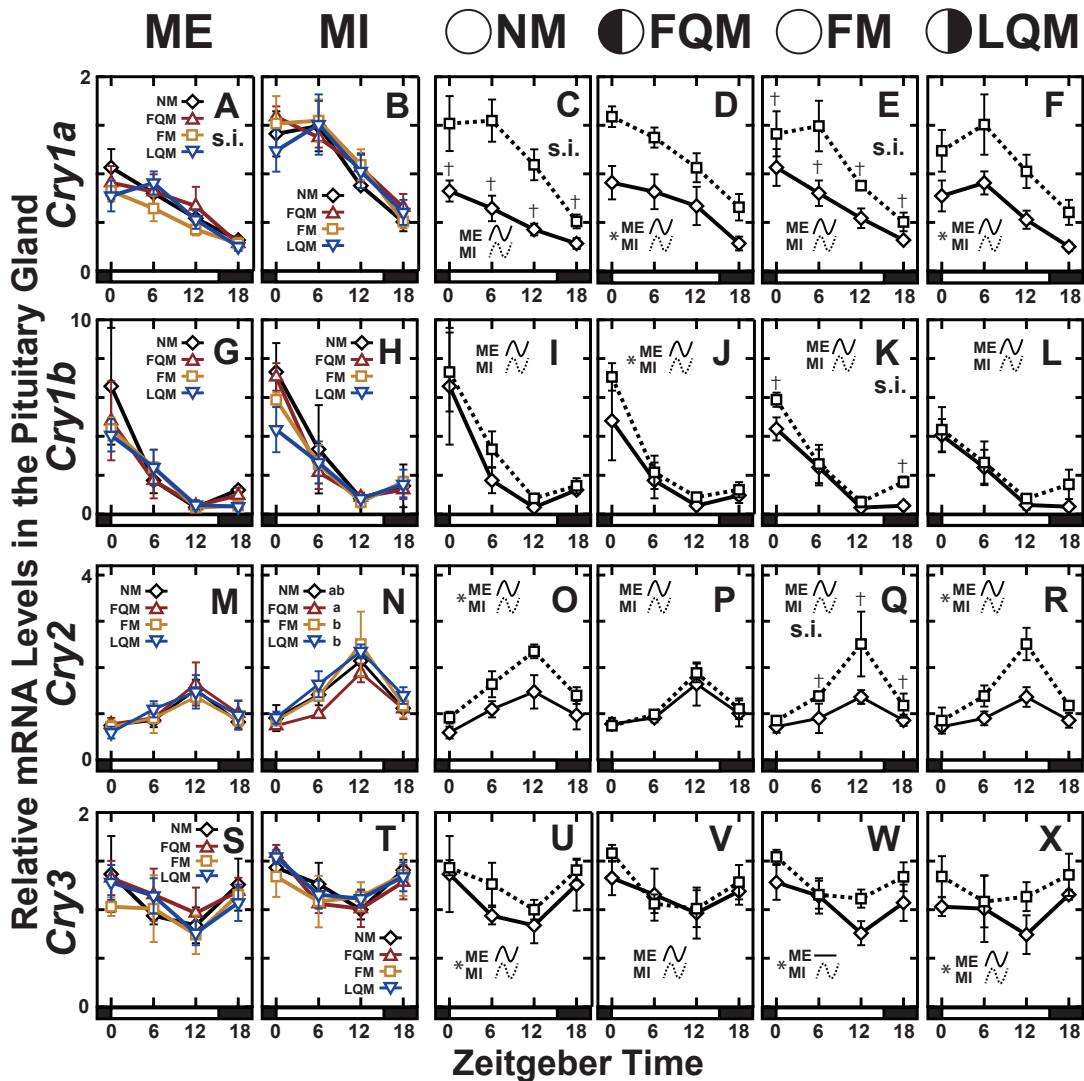

Figure S2. The daily expression profiles of *Cry* genes in the pituitary gland of the Goldlined spinefoot after interrupted moonlight for 1 lunar cycle. The pituitary glands of the fish ( $n = 5$  except for NM-ZT18 and LQM-ZT6 in the ME group, and  $n=4$  in the MI group) were collected at the time points shown in Fig. 1. The bar at the bottom of each graph represents the sunlight conditions. (Panels on the left: A, B, G, H, M, N, S, and T) The daily expression profiles of the genes at four lunar phases in moonlight exposed (ME) and moonlight interrupted (MI) groups. s.i. in panel A indicates a significant interaction. Different letters in panels N indicate statistical differences among lunar phase (two-way factorial ANOVA followed by Tukey's HSD test,  $p < 0.05$ ). (Panels on the right: C-F, I-L, O-R, and U-X) The daily profiles shown on the left are re-plotted to compare the daily profiles of ME and MI groups at each lunar phase. Lunar phases are indicated by schematic moon images. s.i. and asterisks indicate significant interactions and significant differences, respectively, between ME and MI analyzed using two-way factorial ANOVA followed by Tukey's HSD test ( $p < 0.05$ ). Statistical differences between ME and MI at each time point are indicated by daggers (Student's t-test,  $p < 0.05$ ). Curves indicate significant rhythmicities detected with Cosinor analysis, while lines indicate no significant rhythmicity.

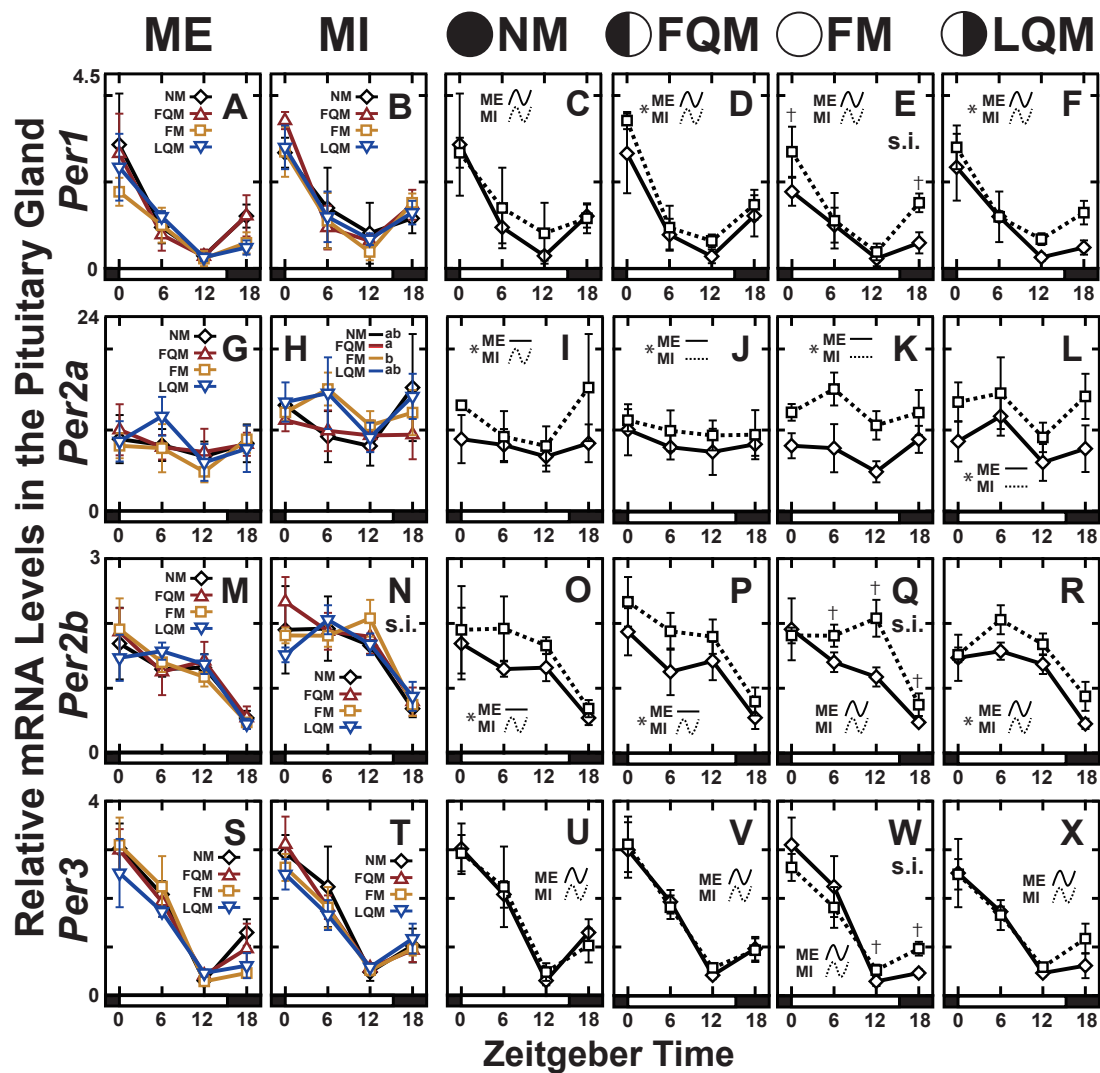

Figure S3. The daily expression profiles of *Per* genes in the pituitary gland of the Goldlined spinefoot after interrupted moonlight for 1 lunar cycle. The pituitary glands of the fish ( $n = 5$  except for NM-ZT18 and LQM-ZT6 in ME group, and MI group [ $n = 4$ ]) were collected at the time points shown in Fig. 1. The bar at the bottom of each graph represents the sunlight conditions. (Panels on the left: A, B, G, H, M, N, S, and T) The daily expression profiles of the genes at four lunar phases in moonlight-exposed (ME: panels A, G, M, and S) and moonlight-interrupted (MI: panels B, H, N, and T) groups. s.i. in panel N indicates significant interaction. The different letters in panel H indicate statistical differences among lunar phases (two-way factorial ANOVA followed by Tukey's HSD test,  $p < 0.05$ ). (Panels on the right: C-F, I-L, O-R, and U-X) The daily profiles shown on the left are replotted to compare the daily profiles of ME and MI groups at each lunar phase. s.i. and asterisks indicate significant interactions and significant differences, respectively, between ME and MI groups analyzed using two-way factorial ANOVA followed by Tukey's HSD test ( $p < 0.05$ ). Statistical differences between ME and MI groups at each time point are indicated by daggers (Student's t-test or Mann–Whitney U test,  $p < 0.05$ ). Curves indicate significant rhythmicities detected with Cosinor analysis, while lines indicate no significant rhythmicity.

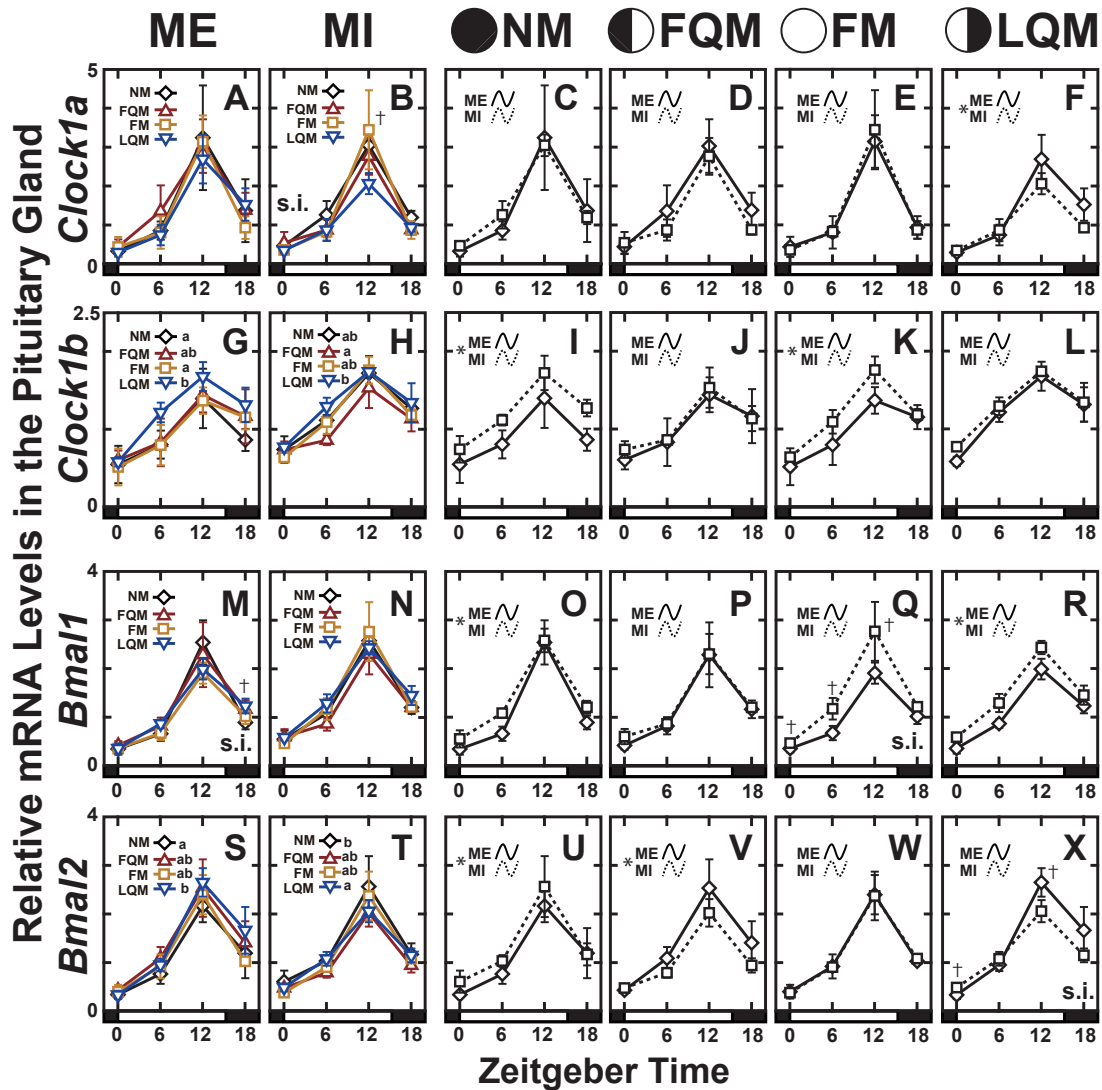

Figure S4. The daily expression profiles of *Clock* and *Bmal* genes in the pituitary gland of the Goldlined spinefoot after interrupted moonlight for 1 lunar cycle. The pituitary glands of the fish ( $n = 5$  except for NM-ZT18 and LQM-ZT6 in ME group, and MI group [ $n = 4$ ]) were collected at the time points shown in Fig. 1. The bar at the bottom of each graph represents the sunlight conditions. (Panels on the left: A, B, G, H, M, N, S, and T) The daily expression profiles of the genes at four lunar phases in moonlight-exposed (ME: panels A, G, M, and S) and moonlight-interrupted (MI: panels B, H, N, and T) groups. (Panels on the right: C-F, I-L, O-R, and U-X) The daily profiles shown on the left are replotted to compare the daily profiles of ME and MI groups at each lunar phase. Curves indicate significant rhythmicities detected with Cosinor analysis.



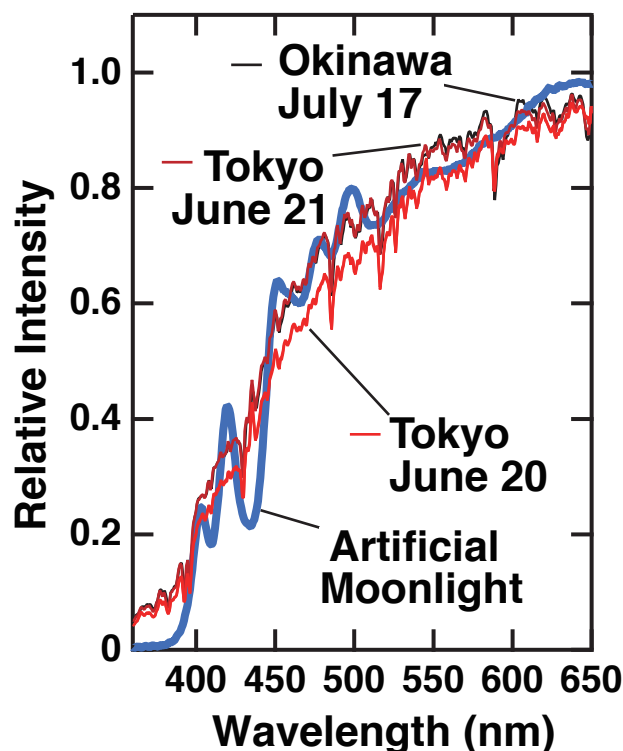

Figure S6. Spectra of natural and artificial moonlight.

The natural moonlight spectrum was measured using a photonic multichannel spectral analyzer (Hamamatsu Photonics, Model PMA-11; type C7473-36) in Tokyo (Suginami city) on June 20 and 21, 2016 (light and dark red lines; Lunar phases 14.5 and 15.5, respectively). An apparatus to measure artificial moonlight was constructed using five power LEDs (UV power LED OSV5XME1C1E (403nm) Optosupply; 3W-UV-Ultra-Violet-420nm, LED generic; Royal Blue LED LuxeonK2; Cyan LuxeonK2; 1W Red-Violet Power LED OSR7XNE1E1E, Optosupply) and five 5mm LEDs (Warm White OSM54K5111A; Cyan OSC34L5111A; Blue OSUB5161A; Lime Green OSC64L5111A; Lavender OSCD4L5111A, all supplied by Optosupply). The combinatorial LED emissions (blue line) were tuned to fit the moonlight spectrum in Tokyo. Moonlight spectrum was also measured at the Sesoko station in Okinawa during an experiment on July 17, 2016 (black line; Lunar phase 12.2). The spectrum was similar to the spectrum in Tokyo on June 21, 2016, and both profiles were roughly reproduced using artificial moonlight.

Table S1 Summary of statistical analysis by three-way ANOVA for evaluating the effect of lunar phase, nocturnal light condition, and Zeitgeber time on the clock gene expressions in the diencephalon of the goldfinch pinefoot.

| Gene           | Lunar Phase (LP) | LP vs ZT (Moonlight Exposed) |                            |                             |                             | LP vs ZT (Moonlight Interrupted) |                             |                             | NLC vs ZT (Moon Phase fixed) |                             |                             |                            |                         |                           |                           |  |
|----------------|------------------|------------------------------|----------------------------|-----------------------------|-----------------------------|----------------------------------|-----------------------------|-----------------------------|------------------------------|-----------------------------|-----------------------------|----------------------------|-------------------------|---------------------------|---------------------------|--|
|                |                  | LP vs ZT vs NLC              |                            | LP vs ZT                    |                             | LP vs ZT                         |                             |                             | NLC vs ZT                    |                             |                             |                            |                         |                           |                           |  |
|                |                  | three-way interaction        | simple interaction         | LP effect                   | ZT effect                   | simple interaction               | LP effect                   | ZT effect                   | simple interaction           | NLC effect                  | ZT effect                   | MC vs W (Student's t-test) |                         |                           |                           |  |
|                |                  |                              |                            |                             |                             |                                  |                             |                             |                              |                             | ZT0                         | ZT6                        | ZT12                    | ZT18                      |                           |  |
| <i>Cry1a</i>   | NM               |                              |                            |                             |                             |                                  |                             |                             | F(3, 28)=0.560, p=0.6161     | F(1, 28)=0.633, p=0.433     | F(3, 28)=17.094, p=1.67e-06 |                            |                         |                           |                           |  |
|                | FQM              |                              |                            |                             |                             |                                  |                             |                             | F(3, 28)=0.600, p=0.5202     | F(1, 28)=0.677, p=0.00642   | F(3, 28)=20.852, p=2.47e-07 |                            |                         |                           |                           |  |
|                | FM               | F(9, 112)=1.046, p=0.408864  | F(9, 64)=1.051, p=0.41095  | F(3, 64)=5.097, p=0.00317   | F(3, 64)=49.634, p<2e-16    | F(9, 48)=0.968, p=0.4776         | F(3, 48)=2.510, p=0.0698    | F(3, 48)=21.759, p=4.86e-09 |                              |                             |                             |                            |                         |                           |                           |  |
|                | LQM              |                              |                            |                             |                             |                                  |                             |                             | F(3, 28)=2.892, p=0.05294    | F(1, 28)=10.081, p=0.00363  | F(3, 28)=19.075, p=6.16e-07 |                            |                         |                           |                           |  |
| <i>Cry1b</i>   | NM               |                              |                            |                             |                             |                                  |                             |                             | F(3, 28)=0.604, p=0.5161     | F(1, 28)=4.304, p=0.0473    | F(3, 28)=29.403, p=3.46e-09 |                            |                         |                           |                           |  |
|                | FQM              |                              |                            |                             |                             |                                  |                             |                             | F(3, 28)=2.506, p=0.0794     | F(1, 28)=0.061, p=0.8065    | F(3, 28)=27.673, p=1.6e-08  |                            |                         |                           |                           |  |
|                | FM               | F(9, 112)=1.646, p=0.110732  | F(9, 64)=1.495, p=0.1691   | F(3, 64)=2.401, p=0.0758    | F(3, 64)=73.779, p<2e-16    | F(9, 48)=2.356, p=0.0271         | F(3, 48)=1.188, p=0.3242    | F(3, 48)=43.871, p=8.52e-14 |                              |                             |                             | W=15, p=0.2857             | t(7)=1.9556, p=0.09138  | t(7)=-0.049836, p=0.9616  | t(7)=-10.001, p=2.138e-05 |  |
|                | LQM              |                              |                            |                             |                             |                                  |                             |                             | F(3, 28)=6.510, p=0.00176    | F(1, 28)=0.075, p=0.78647   | F(3, 28)=47.919, p=3.74e-11 |                            |                         |                           |                           |  |
| <i>Cry2</i>    | NM               |                              |                            |                             |                             |                                  |                             |                             | F(3, 28)=3.610, p=0.0254     | F(1, 28)=1.479, p=0.234     | F(3, 28)=19.319, p=5.48e-07 | t(7)=-0.74226, p=0.4621    | W=1, p=0.9612           | t(7)=1.8161, p=0.1722     | t(7)=-0.28185, p=0.7862   |  |
|                | FQM              |                              |                            |                             |                             |                                  |                             |                             | F(3, 28)=3.199, p=0.03854    | F(1, 28)=12.673, p=0.00135  | F(3, 28)=7.731, p=0.00065   |                            |                         |                           |                           |  |
|                | FM               | F(9, 112)=1.879, p=0.06221   | F(9, 64)=0.346, p=0.95572  | F(3, 64)=5.639, p=0.00171   | F(3, 64)=31.557, p=1.21e-12 | F(9, 48)=1.912, p=0.0727         | F(3, 48)=9.616, p=4.42e-05  | F(3, 48)=20.632, p=9.94e-09 |                              |                             |                             |                            |                         |                           |                           |  |
|                | LQM              |                              |                            |                             |                             |                                  |                             |                             | F(3, 28)=0.979, p=0.417      | F(1, 28)=1.106, p=0.302     | F(3, 28)=15.189, p=4.66e-06 |                            |                         |                           |                           |  |
| <i>Cry3</i>    | NM               |                              |                            |                             |                             |                                  |                             |                             | F(3, 28)=2.604, p=0.0716     | F(1, 28)=1.922, p=0.1763    | F(3, 28)=36.436, p=3.36e-08 |                            |                         |                           |                           |  |
|                | FQM              |                              |                            |                             |                             |                                  |                             |                             | F(3, 28)=0.136, p=0.9379     | F(1, 28)=57.488, p=2.93e-08 | F(3, 28)=3.693, p=0.0234    |                            |                         |                           |                           |  |
|                | FM               | F(9, 112)=0.713, p=0.6964    | F(9, 64)=0.864, p=0.56187  | F(3, 64)=11.380, p=4.48e-06 | F(3, 64)=5.649, p=0.0169    | F(9, 48)=1.776, p=0.09723        | F(3, 48)=5.262, p=0.00321   | F(3, 48)=1.463, p=0.23632   |                              |                             |                             |                            |                         |                           |                           |  |
|                | LQM              |                              |                            |                             |                             |                                  |                             |                             | F(3, 28)=1.396, p=0.2645     | F(1, 28)=9.527, p=0.00453   | F(3, 28)=8.014, p=0.00269   |                            |                         |                           |                           |  |
| <i>Per1</i>    | NM               |                              |                            |                             |                             |                                  |                             |                             | F(3, 28)=3.515, p=0.02797    | F(1, 28)=9.826, p=0.00401   | F(3, 28)=44.431, p=8.59e-11 | t(7)=2.2429, p=0.05982     | t(7)=2.8408, p=0.02502  | t(7)=1.3896, p=0.2072     | t(7)=1.3338, p=0.224      |  |
|                | FQM              |                              |                            |                             |                             |                                  |                             |                             | F(3, 28)=0.616, p=0.00668    | F(1, 28)=1.342, p=0.25638   | F(3, 28)=24.708, p=5.07e-08 | t(7)=1.9722, p=0.0892      | t(7)=-0.27518, p=0.7911 | t(7)=-3.6041, p=0.000692  | t(7)=-2.791, p=0.0673     |  |
|                | FM               | F(9, 112)=0.854, p=0.3561    | F(9, 64)=1.659, p=0.116    | F(3, 64)=2.029, p=0.119     | F(3, 64)=106.06, p<2e-16    | F(9, 48)=1.776, p=0.09782        | F(3, 48)=4.501, p=0.00732   | F(3, 48)=53.321, p=2.59e-15 |                              |                             |                             |                            |                         |                           |                           |  |
|                | LQM              |                              |                            |                             |                             |                                  |                             |                             | F(3, 28)=8.647, p=0.00021    | F(1, 28)=7.41, p=0.01032    | F(3, 28)=39.438, p=3.47e-10 | t(7)=2.4526, p=0.04295     | t(7)=5.3845, p=0.001926 | W=10, p=1                 | t(7)=-3.7572, p=0.007191  |  |
| <i>Per2a</i>   | NM               |                              |                            |                             |                             |                                  |                             |                             | F(3, 28)=6.316, p=0.00208    | F(1, 28)=0.017, p=0.898     | F(3, 28)=40.892, p=2.31e-10 | t(7)=1.4808, p=0.1822      | t(7)=8.82, p=0.02577    | t(7)=-2.8963, p=0.02311   | W=0, p=0.01587            |  |
|                | FQM              |                              |                            |                             |                             |                                  |                             |                             | F(3, 28)=0.317, p=0.812881   | F(1, 28)=4.916, p=0.034904  | F(3, 28)=8.847, p=0.000276  |                            |                         |                           |                           |  |
|                | FM               | F(9, 112)=0.864, p=0.3596    | F(9, 64)=0.137, p=0.998    | F(3, 64)=2.134, p=0.105     | F(3, 64)=37.845, p=3.54e-14 | F(9, 48)=1.664, p=0.12455        | F(3, 48)=2.381, p=0.08115   | F(3, 48)=6.100, p=0.00133   |                              |                             |                             | t(7)=2.4358, p=0.04593     | t(7)=0.44412, p=0.6704  | t(7)=-4.1235, p=0.00444   | t(7)=-0.468995, p=0.6527  |  |
|                | LQM              |                              |                            |                             |                             |                                  |                             |                             | F(3, 28)=3.679, p=0.01946    | F(1, 28)=9.674, p=0.00427   | F(3, 28)=11.145, p=5.48e-05 | t(7)=2.9982, p=0.01996     | t(7)=2.4513, p=0.04533  | t(7)=-0.19197, p=0.8532   | t(7)=-0.1729, p=0.8677    |  |
| <i>Per2b</i>   | NM               |                              |                            |                             |                             |                                  |                             |                             | F(3, 28)=0.362, p=0.78161    | F(1, 28)=6.012, p=0.020709  | F(3, 28)=9.289, p=0.000199  |                            |                         |                           |                           |  |
|                | FQM              |                              |                            |                             |                             |                                  |                             |                             | F(3, 28)=1.600, p=0.2117     | F(1, 28)=5.106, p=0.0319    | F(3, 28)=23.471, p=8.46e-08 |                            |                         |                           |                           |  |
|                | FM               | F(9, 112)=0.942, p=0.37961   | F(9, 64)=1.005, p=0.446    | F(3, 64)=0.597, p=0.619     | F(3, 64)=47.026, p=3.53e-16 | F(9, 48)=2.266, p=0.033206       | F(3, 48)=21.614, p=5.32e-09 | F(3, 48)=8.563, p=0.000117  |                              |                             |                             |                            |                         |                           |                           |  |
|                | LQM              |                              |                            |                             |                             |                                  |                             |                             | F(3, 28)=0.58, p=0.63325     | F(1, 28)=12.34, p=0.00152   | F(3, 28)=45.28, p=7.2e-11   |                            |                         |                           |                           |  |
| <i>Per3</i>    | NM               |                              |                            |                             |                             |                                  |                             |                             | F(3, 28)=1.494, p=0.238      | F(1, 28)=2.587, p=0.119     | F(3, 28)=52.237, p=1.36e-11 |                            |                         |                           |                           |  |
|                | FQM              |                              |                            |                             |                             |                                  |                             |                             | F(3, 28)=0.362, p=0.78161    | F(1, 28)=16.681, p=0.000355 | F(3, 28)=35.350, p=1.17e-09 |                            |                         |                           |                           |  |
|                | FM               | F(9, 112)=0.074, p=0.530166  | F(9, 64)=0.336, p=0.586    | F(3, 64)=2.014, p=0.121     | F(3, 64)=114.504, p<2e-16   | F(9, 48)=1.829, p=0.0992         | F(3, 48)=2.200, p=0.0872    | F(3, 48)=75.609, p<2e-16    |                              |                             |                             |                            |                         |                           |                           |  |
|                | LQM              |                              |                            |                             |                             |                                  |                             |                             | F(3, 28)=4.866, p=0.00912    | F(1, 28)=24.721, p=2.59e-05 | F(3, 28)=6.225, p=7.85e-13  | t(7)=-4.0745, p=0.01987    | t(7)=-0.37949, p=0.7156 | t(7)=-3.0149, p=0.01953   | W=0, p=0.01587            |  |
| <i>Clock1a</i> | NM               |                              |                            |                             |                             |                                  |                             |                             | F(3, 28)=7.836, p=0.000598   | F(1, 28)=48.364, p=1.46e-07 | F(3, 28)=24.167, p=6.33e-08 | W=0, p=0.01987             | W=0, p=0.01587          | W=0, p=0.01587            | t(7)=-0.2424, p=0.8262    |  |
|                | FQM              |                              |                            |                             |                             |                                  |                             |                             | F(3, 28)=3.296, p=0.03492    | F(1, 28)=12.259, p=0.00157  | F(3, 28)=13.692, p=1.1e-05  | W=1, p=0.03175             | W=0, p=0.01587          | W=1, p=0.03175            | t(7)=-0.81614, p=0.4673   |  |
|                | FM               | F(9, 112)=1.167, p=0.3231    | F(9, 64)=0.514, p=0.599    | F(3, 64)=0.812, p=0.492     | F(3, 64)=171.201, p<2e-16   | F(9, 48)=0.88, p=0.5495          | F(3, 48)=2.516, p=0.0693    | F(3, 48)=36.286, p=2.14e-12 |                              |                             |                             |                            |                         |                           |                           |  |
|                | LQM              |                              |                            |                             |                             |                                  |                             |                             | F(3, 28)=2.442, p=0.0851     | F(1, 28)=20.984, p=8.72e-05 | F(3, 28)=19.085, p=5.15e-08 |                            |                         |                           |                           |  |
| <i>Clock1b</i> | NM               |                              |                            |                             |                             |                                  |                             |                             | F(3, 28)=6.475, p=0.00181    | F(1, 28)=78.900, p=1.23e-09 | F(3, 28)=80.026, p=7.57e-14 | t(7)=-4.5074, p=0.002773   | W=0, p=0.01587          | t(7)=-6.3209, p=0.0003961 | t(7)=-5.7558, p=0.0006943 |  |
|                | FQM              |                              |                            |                             |                             |                                  |                             |                             | F(3, 28)=1.228, p=0.31792    | F(1, 28)=9.865, p=0.00395   | F(3, 28)=2.020, p=0.1393    |                            |                         |                           |                           |  |
|                | FM               | F(9, 112)=2.331, p=0.019061  | F(9, 64)=0.634, p=0.7640   | F(3, 64)=2.191, p=0.0976    | F(3, 64)=19.754, p=3.54e-09 | F(9, 48)=2.863, p=0.00672        | F(3, 48)=10.762, p=1.59e-05 | F(3, 48)=17.479, p=8.32e-08 |                              |                             |                             | W=13, p=0.5556             | t(7)=-2.6704, p=0.03198 | W=2, p=0.06349            | t(7)=-2.6301, p=0.03991   |  |
|                | LQM              |                              |                            |                             |                             |                                  |                             |                             | F(3, 28)=0.166, p=0.916872   | F(1, 28)=0.229, p=0.635756  | F(3, 28)=8.813, p=0.00283   |                            |                         |                           |                           |  |
| <i>Bmal1</i>   | NM               |                              |                            |                             |                             |                                  |                             |                             | F(3, 28)=2.470, p=0.0825     | F(1, 28)=7.211, p=0.0120    | F(3, 28)=15.835, p=3.26e-06 |                            |                         |                           |                           |  |
|                | FQM              |                              |                            |                             |                             |                                  |                             |                             | F(3, 28)=3.560, p=0.0267     | F(1, 28)=2.809, p=0.1049    | F(3, 28)=34.243, p=1.86e-09 | t(7)=-2.1692, p=0.0667     | t(7)=-0.53115, p=0.6117 | t(7)=2.044, p=0.08023     | t(7)=1.4724, p=0.1844     |  |
|                | FM               | F(9, 112)=1.242, p=0.27709   | F(9, 64)=0.337, p=0.589    | F(3, 64)=1.878, p=0.142     | F(3, 64)=188.623, p<2e-16   | F(9, 48)=1.598, p=0.1429         | F(3, 48)=2.799, p=0.0499    | F(3, 48)=54.705, p=1.61e-15 |                              |                             |                             |                            |                         |                           |                           |  |
|                | LQM              |                              |                            |                             |                             |                                  |                             |                             | F(3, 28)=2.084, p=0.125      | F(1, 28)=1.617, p=0.214     | F(3, 28)=73.898, p=2.54e-13 |                            |                         |                           |                           |  |
| <i>Bmal2</i>   | NM               |                              |                            |                             |                             |                                  |                             |                             | F(3, 28)=0.942, p=0.433      | F(1, 28)=0.114, p=0.738     | F(3, 28)=91.761, p=1.35e-14 |                            |                         |                           |                           |  |
|                | FQM              |                              |                            |                             |                             |                                  |                             |                             | F(3, 28)=2.276, p=0.102      | F(1, 28)=0.061, p=0.806     | F(3, 28)=32.350, p=3.07e-05 |                            |                         |                           |                           |  |
|                | FM               | F(9, 112)=0.389, p=0.93904   | F(9, 64)=0.926, p=0.506650 | F(3, 64)=7.885, p=0.000148  | F(3, 64)=156.656, p<2e-16   | F(9, 48)=0.446, p=0.902          | F(3, 48)=0.428, p=0.734     | F(3, 48)=34.596, p=4.69e-12 |                              |                             |                             |                            |                         |                           |                           |  |
|                | LQM              |                              |                            |                             |                             |                                  |                             |                             | F(3, 28)=2.855, p=0.0385     | F(1, 28)=9.377, p=0.00461   | F(3, 28)=31.960, p=3.5e-09  |                            |                         |                           |                           |  |



Table S2 Summary of statistical analysis by three-way ANOVA for evaluating the effect of lunar phase, nocturnal light condition, and Zeitgeber time on the clock gene expressions in the pituitary gland of the goldfinch spiofeet.

| Gene           | Lunar Phase (LP) | LPvsZTvsNLC                 | LP vs ZT (Moonlight Exposed) |                           |                             |                            | LP vs ZT (Moonlight Interrupted) |                             |                            | NLC vs ZT (Moon Phase fixed) |                             |                            |                            |                           |                           |
|----------------|------------------|-----------------------------|------------------------------|---------------------------|-----------------------------|----------------------------|----------------------------------|-----------------------------|----------------------------|------------------------------|-----------------------------|----------------------------|----------------------------|---------------------------|---------------------------|
|                |                  |                             | three-way interaction        | simple interaction        | LP effect                   | ZT effect                  | simple interaction               | LP effect                   | ZT effect                  | simple interaction           | NLC effect                  | ZT effect                  | NLC vs ZT (Standard Error) |                           |                           |
|                |                  |                             |                              |                           |                             |                            |                                  |                             |                            |                              | ZT0                         | ZT6                        | ZT12                       | ZT18                      |                           |
| <i>Cry1a</i>   | NM               |                             |                              |                           |                             |                            |                                  |                             | F(3, 27)=4.072, p=0.0165   | F(1, 27)=56.411, p<0.0001    | F(3, 27)=49.778, p<0.0001   | t(7)=-2.4841, p=0.04196    | t(7)=-5.225, p=0.001219    | t(7)=-6.3893, p=0.000371  | t(6)=-3.7387, p=0.006938  |
|                | FQM              | F(9, 110)=1.400, p=0.1987   | F(9, 62)=2.271, p=0.02855    | F(3, 62)=4.872, p=0.0372  | F(3, 62)=88.791, p<2e-16    | F(9, 48)=1.317, p=0.253    | F(3, 48)=1.197, p=0.321          | F(3, 48)=86.114, p<2e-16    | F(3, 28)=2.137, p=0.118    | F(1, 28)=102.058, p<0.0001   | F(3, 28)=45.337, p<0.0001   | no significant interaction |                            |                           |                           |
|                | FM               |                             |                              |                           |                             |                            |                                  |                             | F(3, 28)=8.16, p=0.00485   | F(1, 28)=158.87, p<0.0001    | F(3, 28)=47.52, p<0.0001    | t(7)=-5.1224, p=0.001385   | t(7)=-7.7855, p=0.0001084  | t(7)=-6.6759, p=5.412e-05 | t(7)=-5.3965, p=0.001012  |
|                | LQM              |                             |                              |                           |                             |                            |                                  |                             | F(3, 27)=0.771, p=0.505    | F(1, 27)=70.264, p<0.0001    | F(3, 27)=35.961, p<0.0001   | no significant interaction |                            |                           |                           |
| <i>Cry1b</i>   | NM               |                             |                              |                           |                             |                            |                                  |                             | F(3, 27)=0.328, p=0.805    | F(1, 27)=2.150, p=0.154      | F(3, 27)=30.254, p<0.0001   | no significant interaction |                            |                           |                           |
|                | FQM              | F(9, 110)=1.011, p=0.4573   | F(9, 62)=1.823, p=0.0819     | F(3, 62)=1.539, p=0.2134  | F(3, 62)=76.680, p<2e-16    | F(9, 48)=2.307, p=0.0303   | F(3, 48)=2.428, p=0.0768         | F(3, 48)=100.361, p<2e-16   | F(3, 28)=3.116, p=0.041965 | F(1, 28)=18.029, p=0.000217  | F(3, 28)=121.526, p<0.0001  | t(7)=-4.3703, p=0.003273   | t(7)=-0.28118, p=0.7867    | t(7)=-2.1024, p=0.07361   | t(7)=-4.378, p=6.78e-05   |
|                | FM               |                             |                              |                           |                             |                            |                                  |                             | F(3, 27)=0.735, p=0.5403   | F(1, 27)=2.045, p=0.0544     | F(3, 27)=44.150, p<0.0001   | no significant interaction |                            |                           |                           |
|                | LQM              |                             |                              |                           |                             |                            |                                  |                             | F(3, 27)=2.42, p=0.0879    | F(1, 27)=32.46, p=4.71e-06   | F(3, 27)=40.16, p=4.31e-10  | no significant interaction |                            |                           |                           |
| <i>Cry2</i>    | NM               |                             |                              |                           |                             |                            |                                  |                             | F(3, 28)=0.503, p=0.683    | F(1, 28)=1.376, p=0.251      | F(3, 28)=29.350, p<0.0001   | no significant interaction |                            |                           |                           |
|                | FQM              | F(9, 110)=0.866, p=0.557735 | F(9, 62)=0.791, p=0.625      | F(3, 62)=1.081, p=0.364   | F(3, 62)=42.128, p=5.72e-15 | F(9, 48)=1.120, p=0.367564 | F(3, 48)=6.794, p=0.000656       | F(3, 48)=80.670, p<2e-16    | F(3, 28)=5.191, p=0.00521  | F(1, 28)=29.099, p<0.0001    | F(3, 28)=24.319, p<0.0001   | W=3, p=0.1111              | t(7)=-2.9315, p=0.02198    | t(7)=-3.6249, p=0.000465  | t(7)=-2.4648, p=0.043416  |
|                | FM               |                             |                              |                           |                             |                            |                                  |                             | F(3, 27)=2.519, p=0.0323   | F(1, 27)=45.254, p<0.0001    | F(3, 27)=35.110, p<0.0001   | no significant interaction |                            |                           |                           |
|                | LQM              |                             |                              |                           |                             |                            |                                  |                             | F(3, 27)=0.585, p=0.62995  | F(1, 27)=6.001, p=0.021067   | F(3, 27)=8.2784, p=0.000143 | no significant interaction |                            |                           |                           |
| <i>Cry3</i>    | NM               |                             |                              |                           |                             |                            |                                  |                             | F(3, 28)=1.267, p=0.304749 | F(1, 28)=1.385, p=0.240986   | F(3, 28)=9.252, p=0.000205  | no significant interaction |                            |                           |                           |
|                | FQM              | F(9, 110)=1.058, p=0.400    | F(9, 62)=1.013, p=0.4397     | F(3, 62)=2.287, p=0.0873  | F(3, 62)=14.468, p=2.99e-07 | F(9, 48)=1.284, p=0.27     | F(3, 48)=0.560, p=0.644          | F(3, 48)=22.640, p=2.81e-09 | F(3, 28)=0.959, p=0.42593  | F(1, 28)=12.089, p=0.00167   | F(3, 28)=4.270, p=0.0133    | no significant interaction |                            |                           |                           |
|                | FM               |                             |                              |                           |                             |                            |                                  |                             | F(3, 27)=2.047, p=0.130888 | F(1, 27)=20.700, p=0.000102  | F(3, 27)=15.737, p=4.09e-06 | no significant interaction |                            |                           |                           |
|                | LQM              |                             |                              |                           |                             |                            |                                  |                             | F(3, 27)=0.651, p=0.589    | F(1, 27)=0.751, p=0.394      | F(3, 27)=20.018, p=4.92e-07 | no significant interaction |                            |                           |                           |
| <i>Per1</i>    | NM               |                             |                              |                           |                             |                            |                                  |                             | F(3, 28)=0.695, p=0.5627   | F(1, 28)=5.919, p=0.0216     | F(3, 28)=50.862, p<0.0001   | no significant interaction |                            |                           |                           |
|                | FQM              | F(9, 110)=1.328, p=0.2385   | F(9, 62)=1.751, p=0.0963     | F(3, 62)=2.790, p=0.0478  | F(3, 62)=66.667, p<2e-16    | F(9, 48)=1.160, p=0.342    | F(3, 48)=0.458, p=0.713          | F(3, 48)=88.435, p<2e-16    | F(3, 28)=3.403, p=0.0379   | F(1, 28)=17.700, p=0.0001    | F(3, 28)=39.276, p<0.0001   | t(7)=-3.0784, p=0.01786    | t(7)=-0.29256, p=0.7783    | t(7)=-1.2418, p=0.2543    | t(7)=-5.9134, p=0.0005915 |
|                | FM               |                             |                              |                           |                             |                            |                                  |                             | F(3, 27)=1.347, p=0.28013  | F(1, 27)=0.438, p=0.00481    | F(3, 27)=43.367, p<0.0001   | no significant interaction |                            |                           |                           |
|                | LQM              |                             |                              |                           |                             |                            |                                  |                             | F(3, 27)=1.561, p=0.19892  | F(1, 27)=0.689, p=0.00435    | F(3, 27)=3.687, p=0.02379   | no significant interaction |                            |                           |                           |
| <i>Per2a</i>   | NM               |                             |                              |                           |                             |                            |                                  |                             | F(3, 28)=0.096, p=0.9614   | F(1, 28)=4.198, p=0.0499     | F(3, 28)=1.741, p=0.1813    | no significant interaction |                            |                           |                           |
|                | FQM              | F(9, 110)=1.346, p=0.2219   | F(9, 62)=1.326, p=0.2421     | F(3, 62)=0.818, p=0.48883 | F(3, 62)=5.691, p=0.0165    | F(9, 48)=1.827, p=0.08747  | F(3, 48)=3.184, p=0.03205        | F(3, 48)=5.064, p=0.00387   | F(3, 28)=1.773, p=0.17511  | F(1, 28)=59.061, p=3.36e-08  | F(3, 28)=5.642, p=0.00374   | no significant interaction |                            |                           |                           |
|                | FM               |                             |                              |                           |                             |                            |                                  |                             | F(3, 27)=0.810, p=0.49935  | F(1, 27)=21.545, p=7.98e-05  | F(3, 27)=6.274, p=0.00227   | no significant interaction |                            |                           |                           |
|                | LQM              |                             |                              |                           |                             |                            |                                  |                             | F(3, 27)=0.714, p=0.552    | F(1, 27)=7.158, p=0.0125     | F(3, 27)=16.062, p=3.44e-06 | no significant interaction |                            |                           |                           |
| <i>Per2b</i>   | NM               |                             |                              |                           |                             |                            |                                  |                             | F(3, 28)=0.615, p=0.611445 | F(1, 28)=17.929, p=0.000224  | F(3, 28)=34.574, p=1.49e-09 | no significant interaction |                            |                           |                           |
|                | FQM              | F(9, 110)=1.390, p=0.2011   | F(9, 62)=1.450, p=0.187      | F(3, 62)=0.263, p=0.852   | F(3, 62)=68.133, p<2e-16    | F(9, 48)=2.240, p=0.0352   | F(3, 48)=1.139, p=0.343          | F(3, 48)=56.217, p=9.75e-16 | F(3, 28)=6.801, p=0.00138  | F(1, 28)=22.096, p=2.89e-05  | F(3, 28)=49.911, p=2.32e-11 | W=10, p=1                  | t(7)=-3.8129, p=0.006603   | t(7)=-6.2122, p=0.00044   | W=0, p=0.01587            |
|                | FM               |                             |                              |                           |                             |                            |                                  |                             | F(3, 27)=1.987, p=0.139662 | F(1, 27)=20.674, p=0.000103  | F(3, 27)=54.472, p=1.4e-11  | no significant interaction |                            |                           |                           |
|                | LQM              |                             |                              |                           |                             |                            |                                  |                             | F(3, 27)=0.357, p=0.848    | F(1, 27)=0.000, p=0.999      | F(3, 27)=67.298, p<0.0001   | no significant interaction |                            |                           |                           |
| <i>Per3</i>    | NM               |                             |                              |                           |                             |                            |                                  |                             | F(3, 28)=0.273, p=0.964    | F(1, 28)=0.068, p=0.784      | F(3, 28)=90.647, p<0.0001   | no significant interaction |                            |                           |                           |
|                | FQM              | F(9, 110)=1.376, p=0.2077   | F(9, 62)=1.973, p=0.0577     | F(3, 62)=2.448, p=0.072   | F(3, 62)=81.555, p<2e-16    | F(9, 48)=1.247, p=0.29     | F(3, 48)=1.154, p=0.337          | F(3, 48)=125.530, p<2e-16   | F(3, 28)=3.922, p=0.0186   | F(1, 28)=0.107, p=0.7456     | F(3, 28)=82.870, p=1.16e-14 | t(7)=-1.5083, p=0.1752     | t(7)=-1.1783, p=0.2772     | t(7)=-3.3803, p=0.01175   | t(7)=-6.9448, p=0.0002222 |
|                | FM               |                             |                              |                           |                             |                            |                                  |                             | F(3, 27)=1.520, p=0.232    | F(1, 27)=2.655, p=0.163      | F(3, 27)=80.904, p<0.0001   | no significant interaction |                            |                           |                           |
|                | LQM              |                             |                              |                           |                             |                            |                                  |                             | F(3, 27)=0.463, p=0.711    | F(1, 27)=0.036, p=0.851      | F(3, 27)=33.483, p=3.04e-09 | no significant interaction |                            |                           |                           |
| <i>Clock1a</i> | NM               |                             |                              |                           |                             |                            |                                  |                             | F(3, 28)=0.851, p=0.4781   | F(1, 28)=3.525, p=0.0709     | F(3, 28)=48.837, p<0.0001   | no significant interaction |                            |                           |                           |
|                | FQM              | F(9, 110)=0.700, p=0.7076   | F(9, 62)=0.816, p=0.604      | F(3, 62)=0.656, p=0.582   | F(3, 62)=81.603, p<2e-16    | F(9, 48)=2.240, p=0.0352   | F(3, 48)=4.639, p=0.00629        | F(3, 48)=147.115, p<2e-16   | F(3, 28)=0.294, p=0.63     | F(1, 28)=0.080, p=0.78       | F(3, 28)=85.869, p<0.0001   | no significant interaction |                            |                           |                           |
|                | FM               |                             |                              |                           |                             |                            |                                  |                             | F(3, 26)=2.962, p=0.05070  | F(1, 26)=9.172, p=0.00549    | F(3, 26)=58.219, p=1.14e-11 | no significant interaction |                            |                           |                           |
|                | LQM              |                             |                              |                           |                             |                            |                                  |                             | F(3, 27)=0.345, p=0.792962 | F(1, 27)=17.257, p=0.000294  | F(3, 27)=26.783, p=3.01e-08 | no significant interaction |                            |                           |                           |
| <i>Clock1b</i> | NM               |                             |                              |                           |                             |                            |                                  |                             | F(3, 28)=0.227, p=0.877    | F(1, 28)=0.511, p=0.481      | F(3, 28)=22.895, p=1.23e-07 | no significant interaction |                            |                           |                           |
|                | FQM              | F(9, 110)=0.687, p=0.7191   | F(9, 62)=0.972, p=0.47213    | F(3, 62)=5.921, p=0.00128 | F(3, 62)=56.143, p<2e-16    | F(9, 48)=1.281, p=0.27157  | F(3, 48)=6.320, p=0.00106        | F(3, 48)=119.532, p<2e-16   | F(3, 28)=1.916, p=0.14989  | F(1, 28)=47.496, p=4.14e-11  | F(3, 28)=12.428, p=0.00148  | no significant interaction |                            |                           |                           |
|                | FM               |                             |                              |                           |                             |                            |                                  |                             | F(3, 27)=0.460, p=0.7125   | F(1, 27)=2.988, p=0.0953     | F(3, 27)=71.189, p=6.06e-13 | no significant interaction |                            |                           |                           |
|                | LQM              |                             |                              |                           |                             |                            |                                  |                             | F(3, 27)=1.194, p=0.32078  | F(1, 27)=9.656, p=0.00441    | F(3, 27)=52.999, p<0.0001   | no significant interaction |                            |                           |                           |
| <i>Bmal1</i>   | NM               |                             |                              |                           |                             |                            |                                  |                             | F(3, 28)=0.129, p=0.942    | F(1, 28)=0.500, p=0.485      | F(3, 28)=55.746, p<0.0001   | no significant interaction |                            |                           |                           |
|                | FQM              | F(9, 110)=1.652, p=0.1094   | F(9, 62)=2.475, p=0.0175     | F(3, 62)=2.002, p=0.1229  | F(3, 62)=196.159, p<2e-16   | F(9, 48)=1.545, p=0.159    | F(3, 48)=2.143, p=0.107          | F(3, 48)=207.184, p<2e-16   | F(3, 28)=4.33, p=0.0125    | F(1, 28)=26.01, p=2.11e-05   | F(3, 28)=96.79, p=6.88e-15  | t(7)=-2.4058, p=0.04707    | t(7)=-4.0909, p=0.00046    | t(7)=-3.0004, p=0.01993   | t(7)=-2.2722, p=0.05729   |
|                | FM               |                             |                              |                           |                             |                            |                                  |                             | F(3, 26)=1.321, p=0.288    | F(1, 26)=37.181, p=1.64e-06  | F(3, 26)=196.126, p<2e-16   | no significant interaction |                            |                           |                           |
|                | LQM              |                             |                              |                           |                             |                            |                                  |                             | F(3, 27)=0.620, p=0.6080   | F(1, 27)=4.327, p=0.0471     | F(3, 27)=53.776, p=1.62e-11 | no significant interaction |                            |                           |                           |
| <i>Bmal2</i>   | NM               |                             |                              |                           |                             |                            |                                  |                             | F(3, 28)=1.412, p=0.26009  | F(1, 28)=6.490, p=0.00695    | F(3, 28)=55.636, p<0.0001   | no significant interaction |                            |                           |                           |
|                | FQM              | F(9, 109)=1.266, p=0.263455 | F(9, 62)=1.032, p=0.42513    | F(3, 62)=4.165, p=0.00943 | F(3, 62)=150.998, p<2e-16   | F(9, 47)=0.971, p=0.4758   | F(3, 47)=3.777, p=0.0168         | F(3, 47)=141.828, p<2e-16   | F(3, 28)=0.049, p=0.985    | F(1, 28)=0.001, p=0.981      | F(3, 28)=81.831, p<0.0001   | no significant interaction |                            |                           |                           |
|                | FM               |                             |                              |                           |                             |                            |                                  |                             | F(3, 26)=5.375, p=0.00515  | F(1, 26)=11.358, p=0.00236   | F(3, 26)=96.841, p=3.12e-14 | t(7)=-2.6494, p=0.03297    | t(6)=-1.2941, p=0.2432     | t(6)=-2.9473, p=0.0257    | t(7)=-2.0476, p=0.07982   |
|                | LQM              |                             |                              |                           |                             |                            |                                  |                             |                            |                              |                             | no significant interaction |                            |                           |                           |

Table S3 Cosinor analysis of clock gene expression levels in the diencephalon

| Gene           | Lunar Phase (LP) | Nocturnal Light Condition (NLC) |      |         |                            |      |         |
|----------------|------------------|---------------------------------|------|---------|----------------------------|------|---------|
|                |                  | Moonlight Exposed (ME)          |      |         | Moonlight Interrupted (MI) |      |         |
|                |                  | Acrophase                       | SEM  | p value | Acrophase                  | SEM  | p value |
| <i>Cry1a</i>   | NM               | 4.2                             | 1.33 | <0.001  | 4.1                        | 1.55 | 0.002   |
|                | FQM              | 5.4                             | 1.33 | <0.001  | 6.1                        | 1.58 | 0.002   |
|                | FM               | 5.5                             | 1.30 | <0.001  | 4.9                        | 1.67 | 0.018   |
|                | LQM              | 3.9                             | 1.34 | <0.001  | 6.2                        | 1.63 | 0.007   |
| <i>Cry1b</i>   | NM               | 1.4                             | 0.99 | <0.001  | 1.9                        | 1.10 | <0.001  |
|                | FQM              | 1.5                             | 1.06 | <0.001  | 1.7                        | 1.50 | 0.002   |
|                | FM               | 1.5                             | 0.89 | <0.001  | 23.3                       | 1.26 | <0.001  |
|                | LQM              | 2.9                             | 1.10 | <0.001  | 23.6                       | 1.39 | 0.006   |
| <i>Cry2</i>    | NM               | 12.7                            | 1.38 | 0.006   | 10.9                       | 1.30 | 0.031   |
|                | FQM              | 11.5                            | 1.31 | <0.001  | 9.9                        | 1.48 | 0.012   |
|                | FM               | 11.7                            | 1.31 | <0.001  | 10.8                       | 1.44 | 0.003   |
|                | LQM              | 11.6                            | 1.36 | 0.001   | 11.5                       | 1.32 | <0.001  |
| <i>Cry3</i>    | NM               | n.d.                            | 1.60 | 0.163   | n.d.                       | 1.62 | 0.059   |
|                | FQM              | n.d.                            | 1.62 | 0.068   | n.d.                       | 1.79 | 0.332   |
|                | FM               | n.d.                            | 1.64 | 0.440   | n.d.                       | 1.78 | 0.182   |
|                | LQM              | 23.1                            | 1.56 | 0.006   | n.d.                       | 1.80 | 0.059   |
| <i>Per1</i>    | NM               | 0.1                             | 0.99 | <0.001  | 23.4                       | 1.10 | <0.001  |
|                | FQM              | 0.2                             | 1.06 | <0.001  | 22.0                       | 1.50 | 0.009   |
|                | FM               | 0.7                             | 0.89 | <0.001  | 21.8                       | 1.26 | <0.001  |
|                | LQM              | 0.6                             | 1.10 | <0.001  | 22.1                       | 1.39 | <0.001  |
| <i>Per2a</i>   | NM               | 2.1                             | 1.37 | 0.008   | 1.0                        | 1.54 | 0.015   |
|                | FQM              | 1.9                             | 1.29 | <0.001  | n.d.                       | 1.73 | 0.109   |
|                | FM               | 2.2                             | 1.36 | <0.001  | n.d.                       | 1.80 | 0.413   |
|                | LQM              | 2.8                             | 1.37 | <0.001  | n.d.                       | 1.77 | 0.145   |
| <i>Per2b</i>   | NM               | 5.2                             | 1.40 | 0.005   | 4.0                        | 1.41 | 0.007   |
|                | FQM              | 6.3                             | 1.26 | <0.001  | 8.1                        | 1.39 | 0.001   |
|                | FM               | 5.4                             | 1.38 | <0.001  | n.d.                       | 1.68 | 0.082   |
|                | LQM              | 5.9                             | 1.27 | <0.001  | 6.6                        | 1.52 | <0.001  |
| <i>Per3</i>    | NM               | 2.1                             | 0.94 | <0.001  | 1.3                        | 1.08 | <0.001  |
|                | FQM              | 2.8                             | 1.00 | <0.001  | 2.1                        | 1.33 | <0.001  |
|                | FM               | 1.9                             | 0.87 | <0.001  | 0.0                        | 1.24 | <0.001  |
|                | LQM              | 2.6                             | 0.87 | <0.001  | 0.9                        | 1.14 | <0.001  |
| <i>Clock1a</i> | NM               | 12.8                            | 1.01 | <0.001  | 11.4                       | 1.14 | 0.003   |
|                | FQM              | 12.3                            | 1.08 | <0.001  | 11.1                       | 1.08 | 0.014   |
|                | FM               | 12.7                            | 0.97 | <0.001  | 11.1                       | 1.18 | 0.003   |
|                | LQM              | 11.9                            | 1.06 | <0.001  | 11.6                       | 1.22 | <0.001  |
| <i>Clock1b</i> | NM               | 11.2                            | 1.51 | 0.020   | n.d.                       | 1.86 | 0.897   |
|                | FQM              | 12.8                            | 1.44 | <0.001  | 10.5                       | 1.37 | <0.001  |
|                | FM               | 12.3                            | 1.44 | 0.003   | 12.7                       | 1.57 | 0.013   |
|                | LQM              | 12.9                            | 1.50 | 0.015   | 12.5                       | 1.57 | <0.001  |
| <i>Bmal1</i>   | NM               | 11.8                            | 0.81 | <0.001  | 10.4                       | 1.06 | 0.001   |
|                | FQM              | 12.2                            | 0.92 | <0.001  | 11.1                       | 1.48 | 0.001   |
|                | FM               | 12.2                            | 0.80 | <0.001  | 11.1                       | 1.06 | <0.001  |
|                | LQM              | 10.7                            | 0.70 | <0.001  | 11.3                       | 1.17 | <0.001  |
| <i>Bmal2</i>   | NM               | 13.2                            | 1.19 | <0.001  | 11.4                       | 1.54 | 0.006   |
|                | FQM              | 13.1                            | 1.20 | <0.001  | 11.1                       | 1.25 | 0.009   |
|                | FM               | 11.0                            | 1.16 | 0.001   | 11.0                       | 1.35 | 0.001   |
|                | LQM              | 12.3                            | 1.13 | <0.001  | 11.6                       | 1.29 | <0.001  |

Table S4 Cosinor analysis of clock gene expression levels in the pituitary gland

| Gene           | Lunar Phase (LP) | Nocturnal Light Condition (NLC) |      |         |                            |      |         |
|----------------|------------------|---------------------------------|------|---------|----------------------------|------|---------|
|                |                  | Moonlight Exposed (ME)          |      |         | Moonlight Interrupted (MI) |      |         |
|                |                  | Acrophase                       | SEM  | p value | Acrophase                  | SEM  | p value |
| <i>Cry1a</i>   | NM               | 3.1                             | 1.22 | <0.001  | 4.1                        | 1.41 | <0.001  |
|                | FQM              | 4.4                             | 1.34 | 0.001   | 3.6                        | 1.55 | <0.001  |
|                | FM               | 2.8                             | 1.29 | <0.001  | 4.5                        | 1.45 | <0.001  |
|                | LQM              | 4.2                             | 1.31 | <0.001  | 5.1                        | 1.51 | <0.001  |
| <i>Cry1b</i>   | NM               | 0.5                             | 0.59 | <0.001  | 1.1                        | 0.91 | <0.001  |
|                | FQM              | 0.7                             | 0.75 | <0.001  | 0.6                        | 0.86 | <0.001  |
|                | FM               | 1.7                             | 0.69 | <0.001  | 0.7                        | 0.96 | <0.001  |
|                | LQM              | 1.5                             | 0.73 | <0.001  | 1.2                        | 1.15 | <0.001  |
| <i>Cry2</i>    | NM               | 11.0                            | 1.35 | <0.001  | 11.1                       | 1.47 | <0.001  |
|                | FQM              | 12.4                            | 1.37 | 0.001   | 12.4                       | 1.45 | <0.001  |
|                | FM               | 11.7                            | 1.42 | 0.001   | 11.5                       | 1.37 | <0.001  |
|                | LQM              | 12.4                            | 1.32 | <0.001  | 11.4                       | 1.47 | <0.001  |
| <i>Cry3</i>    | NM               | 23.5                            | 1.49 | 0.005   | 22.8                       | 1.74 | 0.003   |
|                | FQM              | 23.6                            | 1.57 | 0.049   | 1.3                        | 1.11 | <0.001  |
|                | FM               | n.d.                            | 1.57 | 0.110   | 1.5                        | 1.18 | <0.001  |
|                | LQM              | 22.9                            | 1.48 | 0.001   | 22.4                       | 1.74 | 0.001   |
| <i>Per1</i>    | NM               | 24.0                            | 1.49 | <0.001  | 0.5                        | 1.74 | 0.005   |
|                | FQM              | 23.3                            | 1.57 | <0.001  | 23.3                       | 1.11 | <0.001  |
|                | FM               | 1.0                             | 1.57 | <0.001  | 23.3                       | 1.18 | <0.001  |
|                | LQM              | 0.9                             | 1.48 | <0.001  | 23.8                       | 1.74 | <0.001  |
| <i>Per2a</i>   | NM               | n.d.                            | 1.56 | 0.351   | 20.6                       | 1.58 | 0.038   |
|                | FQM              | n.d.                            | 1.57 | 0.208   | n.d.                       | 1.82 | 0.478   |
|                | FM               | n.d.                            | 1.51 | 0.075   | n.d.                       | 1.78 | 0.160   |
|                | LQM              | n.d.                            | 1.54 | 0.070   | n.d.                       | 1.75 | 0.228   |
| <i>Per2b</i>   | NM               | n.d.                            | 1.37 | 0.051   | 5.3                        | 1.52 | 0.010   |
|                | FQM              | n.d.                            | 1.43 | 0.054   | 4.2                        | 1.57 | 0.014   |
|                | FM               | 3.4                             | 1.30 | 0.001   | 6.9                        | 1.59 | 0.009   |
|                | LQM              | 5.5                             | 1.40 | <0.001  | 6.5                        | 1.54 | <0.001  |
| <i>Per3</i>    | NM               | 1.4                             | 0.94 | <0.001  | 1.7                        | 1.13 | <0.001  |
|                | FQM              | 1.4                             | 0.96 | <0.001  | 1.3                        | 1.11 | <0.001  |
|                | FM               | 2.2                             | 0.78 | <0.001  | 1.5                        | 1.18 | <0.001  |
|                | LQM              | 1.4                             | 0.96 | <0.001  | 1.0                        | 1.27 | <0.001  |
| <i>Clock1a</i> | NM               | 12.3                            | 0.80 | <0.001  | 11.9                       | 1.08 | <0.001  |
|                | FQM              | 12.0                            | 1.00 | <0.001  | 12.0                       | 1.07 | <0.001  |
|                | FM               | 12.2                            | 0.84 | <0.001  | 12.1                       | 0.84 | <0.001  |
|                | LQM              | 13.4                            | 0.85 | <0.001  | 12.1                       | 1.13 | <0.001  |
| <i>Clock1b</i> | NM               | 11.5                            | 1.28 | <0.001  | 12.6                       | 1.52 | <0.001  |
|                | FQM              | 13.5                            | 1.33 | <0.001  | 13.3                       | 1.53 | <0.001  |
|                | FM               | 13.5                            | 1.30 | <0.001  | 12.3                       | 1.45 | <0.001  |
|                | LQM              | 13.2                            | 1.28 | <0.001  | 12.2                       | 1.55 | <0.001  |
| <i>Bmal1</i>   | NM               | 12.1                            | 0.83 | <0.001  | 12.2                       | 1.20 | <0.001  |
|                | FQM              | 12.7                            | 1.02 | <0.001  | 12.8                       | 1.25 | <0.001  |
|                | FM               | 12.8                            | 1.02 | <0.001  | 12.1                       | 1.13 | <0.001  |
|                | LQM              | 13.2                            | 1.02 | <0.001  | 12.3                       | 1.30 | <0.001  |
| <i>Bmal2</i>   | NM               | 12.4                            | 0.97 | <0.001  | 12.3                       | 1.21 | <0.001  |
|                | FQM              | 12.6                            | 1.05 | <0.001  | 12.4                       | 1.21 | <0.001  |
|                | FM               | 12.2                            | 0.99 | <0.001  | 12.3                       | 1.11 | <0.001  |
|                | LQM              | 13.4                            | 0.93 | <0.001  | 12.3                       | 1.44 | <0.001  |

Table S5 Accession numbers of CRYs used in the phylogenetic analysis

| <b>Protein name</b>                 | <b>Accession number</b> |
|-------------------------------------|-------------------------|
| Goldlined spinefood CRY1a           | FX985477                |
| Goldlined spinefood CRY1b           | BAL72538                |
| Goldlined spinefood CRY2            | FX985476                |
| Goldlined spinefood CRY3            | BAL72539                |
| Goldlined spinefood CRY6            | FX985478                |
| Zebrafish CRY1a                     | NP_001070765            |
| Zebrafish CRY1b                     | BAA96847                |
| Zebrafish CRY2a                     | BAA96848                |
| Zebrafish CRY2b                     | NP_571867               |
| Zebrafish CRY3                      | AAH46088                |
| Zebrafish CRY4                      | BAA96851                |
| Zebrafish CRY6                      | XP_009291670            |
| Nile tilapia CRY1a                  | XP_005456675            |
| Nile tilapia CRY1b                  | XP_005471126            |
| Nile tilapia CRY2a                  | XP_005477802            |
| Nile tilapia CRY3                   | XP_013129259            |
| Seabass CRY1                        | AFP33464                |
| Seabass CRY2                        | AFP33463                |
| <i>Xenopus tropicalis</i> CRY1      | NP_001017311            |
| <i>Xenopus tropicalis</i> CRY2      | BAI82612                |
| <i>Xenopus tropicalis</i> CRY4      | BAO09600                |
| <i>Xenopus tropicalis</i> CRY6      | XP_002938187            |
| Chicken CRY1                        | AAK61385                |
| Chicken CRY2                        | AAK61386                |
| Chicken CRY4                        | NP_001034685            |
| Mouse CRY1                          | NP_031797               |
| Mouse CRY2                          | NP_034093               |
| <i>Anopheles gambia</i> CRY1        | ABB29886                |
| <i>Danaus plexippus</i> CRY1        | AAX58599                |
| <i>Drosophila melanogaster</i> CRY1 | AAC83828                |
| <i>Anopheles gambia</i> CRY2        | ABB29887                |
| <i>Danaus plexippus</i> CRY2        | ABA62409                |

Table S6 Accession numbers of PERs used in the phylogenetic analysis

| <b>Protein name</b>                       | <b>Accession number</b>   |
|-------------------------------------------|---------------------------|
| <b>Goldlined spinefood PER1</b>           | <b>ABA42096</b>           |
| <b>Goldlined spinefood PER2a</b>          | <b>FX985479</b>           |
| <b>Goldlined spinefood PER2b</b>          | <b>EF208027</b>           |
| <b>Goldlined spinefood PER3</b>           | <b>FX985480</b>           |
| <b>Zebrafish PER1a</b>                    | <b>NP_001025354</b>       |
| <b>Zebrafish PER1b</b>                    | <b>NP_997604</b>          |
| <b>Zebrafish PER2</b>                     | <b>NP_878277</b>          |
| <b>Zebrafish PER3</b>                     | <b>NP_571659</b>          |
| <b>Nile tilapia PER1b</b>                 | <b>ENSONIP00000011630</b> |
| <b>Nile tilapia PER2a</b>                 | <b>ENSONIP00000012334</b> |
| <b>Nile tilapia PER2</b>                  | <b>ENSONIP00000009999</b> |
| <b>Nile tilapia PER3</b>                  | <b>ENSONIP00000024320</b> |
| <b>Seabass PER1</b>                       | <b>ADI71975</b>           |
| <b>Senegal sole PER2</b>                  | <b>CAQ86911</b>           |
| <b>Senegal sole PER3</b>                  | <b>CAQ68365</b>           |
| <b><i>Xenopus tropicalis</i> PER1</b>     | <b>AAI21905</b>           |
| <b><i>Xenopus tropicalis</i> PER2b</b>    | <b>XP_012825562</b>       |
| <b><i>Xenopus tropicalis</i> PER3</b>     | <b>NP_001072696</b>       |
| <b>Mouse PER1</b>                         | <b>NP_035195</b>          |
| <b>Mouse PER2</b>                         | <b>NP_035196</b>          |
| <b>Mouse PER3</b>                         | <b>NP_035197</b>          |
| <b><i>Drosophila melanogaster</i> PER</b> | <b>NP_525056</b>          |

Table S7 Accession numbers of CLOCKs used in the phylogenetic analysis

| <b>Protein name</b>           | <b>Accession number</b> |
|-------------------------------|-------------------------|
| Gollined spinefoot CLOCK1a    | FX985868                |
| Gollined spinefoot CLOCK1b    | LC367223                |
| Chicken CLOCK                 | AAL98708                |
| Mouse CLOCK                   | NP_031741               |
| Human CLOCK                   | AAF13733                |
| Xenopus laevis CLOCK          | NP_001083854            |
| Xenopus tropicalis CLOCK      | NP_001122127            |
| Nile tilapia CLOCK1a          | XP_019207337            |
| Nile tilapia CLOCK1b          | XP_003452181            |
| Zebrafish CLOCK1a             | NP_571032               |
| Zebrafish CLOCK1b             | NP_840080               |
| Zebrafish CLOCK2 (NPAS2)      | NP_840084               |
| Drosophila melanogaster CLOCK | AAC39101                |

Table S8 Accession numbers of BMALs used in the phylogenetic analysis

| <b>Protein name</b>                         | <b>Accession number</b> |
|---------------------------------------------|-------------------------|
| <b>Goldlined spinefood BMAL1</b>            | <b>FX985869</b>         |
| <b>Goldlined spinefood BMAL2</b>            | <b>LC367224</b>         |
| <b>Chicken BMAL1</b>                        | <b>NP_001001463</b>     |
| <b>Chicken BMAL2</b>                        | <b>NP_989464</b>        |
| <b>Human BMAL1a</b>                         | <b>NP_001284653</b>     |
| <b>Human BMAL2</b>                          | <b>BAB01485</b>         |
| <b>Mouse BMAL1</b>                          | <b>NP_001229977</b>     |
| <b>mouse BMAL2</b>                          | <b>ABC79590</b>         |
| <b><i>Xenopus laevis</i> BMAL1</b>          | <b>AAW80970</b>         |
| <b>Zebrafish BMAL1</b>                      | <b>NP_571652</b>        |
| <b>Zebrafish BMAL2</b>                      | <b>NP_571653</b>        |
| <b><i>Drosophila melanogaster</i> CYCLE</b> | <b>NP_524168</b>        |
